# Supplementary material for: First case report of vancomycin-intermediate sequence type 72 Staphylococcus aureuswith nonsusceptibility to daptomycin
Source: PubMed Central journal article supplement (PMC4150982; doi:10.1186/1471-2334-14-459), 2014-08-23

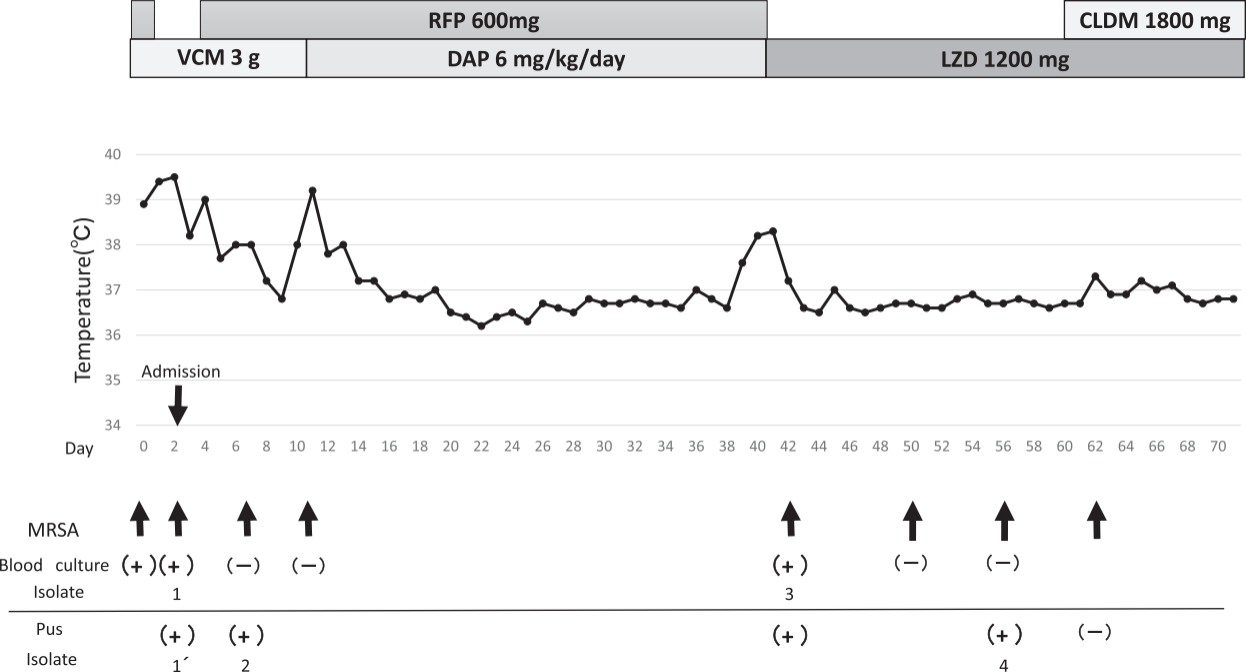

Supplement: 12879_2014_3751_MOESM1_ESM.pdf [file 12879_2014_3751_MOESM1_ESM.pdf]
